# Supplementary material for: Selective perrhenate/pertechnetate removal by a MOF-based molecular trap
Source: Royal Society of Chemistry journal article supplement (doi:10.1039/d1dt04175d), 2022-01-01
Supplement: d1dt04175d1.pdf [file d1dt04175d1.pdf]

## Supporting Information

Superior selective removal of perrhenate/pertechnetate by a  
MOF-based molecule-trap

Hai-Ruo Li<sup>1</sup>, Yi-Ning Mao<sup>1</sup>, Jing Chen<sup>1</sup>, Hang Zhou<sup>1</sup>, Cheng-Peng Li<sup>1\*</sup> & Miao Du<sup>2\*</sup>

*<sup>1</sup>Tianjin Key Laboratory of Structure and Performance for Functional Molecules,*

*College of Chemistry, Tianjin Normal University, Tianjin 300387, P. R. China*

*<sup>2</sup>College of Material and Chemical Engineering, Zhengzhou University of Light*

*Industry, Zhengzhou 450001, China*

\* Email: [hxxylcp@tjnu.edu.cn](mailto:hxxylcp@tjnu.edu.cn) (C.-P. Li); [dumiao@zzuli.edu.cn](mailto:dumiao@zzuli.edu.cn) (M. Du).

**Table S1.** Crystallographic parameters for TNU-132 and TNU-132(Re).

|                                                                               | TNU-132                                                          | TNU-132(Re)                                                                                   |
|-------------------------------------------------------------------------------|------------------------------------------------------------------|-----------------------------------------------------------------------------------------------|
| Chemical formula                                                              | C <sub>26</sub> H <sub>18</sub> AgN <sub>4</sub> BF <sub>4</sub> | C <sub>26</sub> H <sub>18</sub> Ag <sub>2</sub> N <sub>4</sub> Re <sub>2</sub> O <sub>8</sub> |
| Formula mass                                                                  | 581.12                                                           | 1102.58                                                                                       |
| Crystal system                                                                | Monoclinic                                                       | Orthorhombic                                                                                  |
| <i>a</i> /Å                                                                   | 9.4608(3)                                                        | 21.6514(14)                                                                                   |
| <i>b</i> /Å                                                                   | 22.8750(5)                                                       | 10.3653(6)                                                                                    |
| <i>c</i> /Å                                                                   | 13.4599(3)                                                       | 24.7561(15)                                                                                   |
| $\alpha$ /°                                                                   | 90                                                               | 90                                                                                            |
| $\beta$ /°                                                                    | 105.718(2)                                                       | 90                                                                                            |
| $\gamma$ /°                                                                   | 90                                                               | 90                                                                                            |
| Unit cell volume/Å <sup>3</sup>                                               | 2804.01(13)                                                      | 5555.8(6)                                                                                     |
| Temperature/K                                                                 | 293(2)                                                           | 296(2)                                                                                        |
| Space group                                                                   | <i>P</i> 2 <sub>1</sub> / <i>n</i>                               | <i>Pbca</i>                                                                                   |
| <i>Z</i>                                                                      | 4                                                                | 8                                                                                             |
| Absorption coefficient, $\mu$ /mm <sup>-1</sup>                               | 6.173                                                            | 10.133                                                                                        |
| <i>R</i> <sub>int</sub>                                                       | 0.0439                                                           | 0.0757                                                                                        |
| Final <i>R</i> <sub>1</sub> values ( <i>I</i> > 2σ( <i>I</i> ))               | 0.0572                                                           | 0.0378                                                                                        |
| Final <i>wR</i> ( <i>F</i> <sup>2</sup> ) values ( <i>I</i> > 2σ( <i>I</i> )) | 0.1649                                                           | 0.0879                                                                                        |
| Final <i>R</i> <sub>1</sub> values (all data)                                 | 0.0634                                                           | 0.0573                                                                                        |
| Final <i>wR</i> ( <i>F</i> <sup>2</sup> ) values (all data)                   | 0.1735                                                           | 0.0944                                                                                        |
| Goodness of fit on <i>F</i> <sup>2</sup>                                      | 1.035                                                            | 1.041                                                                                         |

**Table S2.** Selective bond lengths (Å) and angles (°) for TNU-132.

| TNU-132                                                                                   |            |            |            |
|-------------------------------------------------------------------------------------------|------------|------------|------------|
| Ag1–N1                                                                                    | 2.282(3)   | Ag1–N2A    | 2.375(3)   |
| Ag1–N3B                                                                                   | 2.331(3)   | Ag1–N4C    | 2.432(3)   |
| N2A–Ag1–N4C                                                                               | 87.74(12)  | N1–Ag1–N2A | 125.80(12) |
| N1–Ag1–N4C                                                                                | 99.95(12)  | N1–Ag1–N3B | 120.24(12) |
| N2A–Ag1–N3B                                                                               | 101.06(12) | N3BAg1–N4C | 118.54(12) |
| Symmetry code: A = 1/2 + x, 1/2 – y, –1/2 + z; B = x, y, –1 + z; C = 2 – x, 1 – y, 1 – z. |            |            |            |
| TNU-132(Re)                                                                               |            |            |            |
| Ag1–N3B                                                                                   | 2.162(6)   | Ag1–N2     | 2.164(6)   |
| Ag1–O6                                                                                    | 2.742(6)   | Ag2–N1     | 2.208(6)   |
| Ag2–O1                                                                                    | 2.583(7)   | Ag2–N4A    | 2.180(6)   |
| N3B–Ag1–N2                                                                                | 177.3(3)   | O6–Ag1–N2  | 92.1(2)    |
| N3B–Ag1–O6                                                                                | 89.8(2)    | N4A–Ag2–N1 | 166.2(2)   |
| N4A–Ag2–O1                                                                                | 98.8(2)    | O1–Ag2–N1  | 91.0(2)    |
| Symmetry code: A = 1/2 + x, 1/2 – y, 2 – z; B = x, 1/2 – y, 1/2 + z.                      |            |            |            |

**Table S3.** Model parameters and correlation coefficient for Cr(VI) and Re(VII) sorption kinetics by TNU-132.

|         | $k_2$ (g mg <sup>-1</sup> min <sup>-1</sup> ) | $q_e$ (mg g <sup>-1</sup> ) | $R^2$  |
|---------|-----------------------------------------------|-----------------------------|--------|
| Cr(VI)  | 0.0013                                        | 65.23                       | 0.9994 |
| Re(VII) | 0.0021                                        | 318.58                      | 0.9998 |

**Table S4.** Fitting results of ReO<sub>4</sub><sup>-</sup> sorption by TNU-132 based on the Langmuir model.

| Samples | $k_2$ (g mg <sup>-1</sup> min <sup>-1</sup> ) | $q_e$ (mg g <sup>-1</sup> ) | $R^2$  |
|---------|-----------------------------------------------|-----------------------------|--------|
| TNU-132 | 334.38                                        | 0.028                       | 0.9998 |

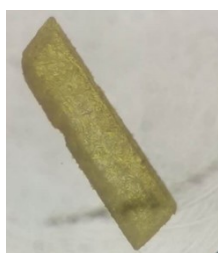

(a)

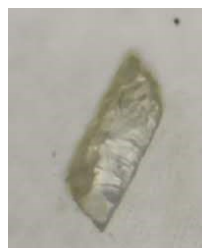

(b)

**Figure S1.** Photos of the TNU-132(Cr) crystals (a) and the transparent inner core (b) after taking off the surface layer.

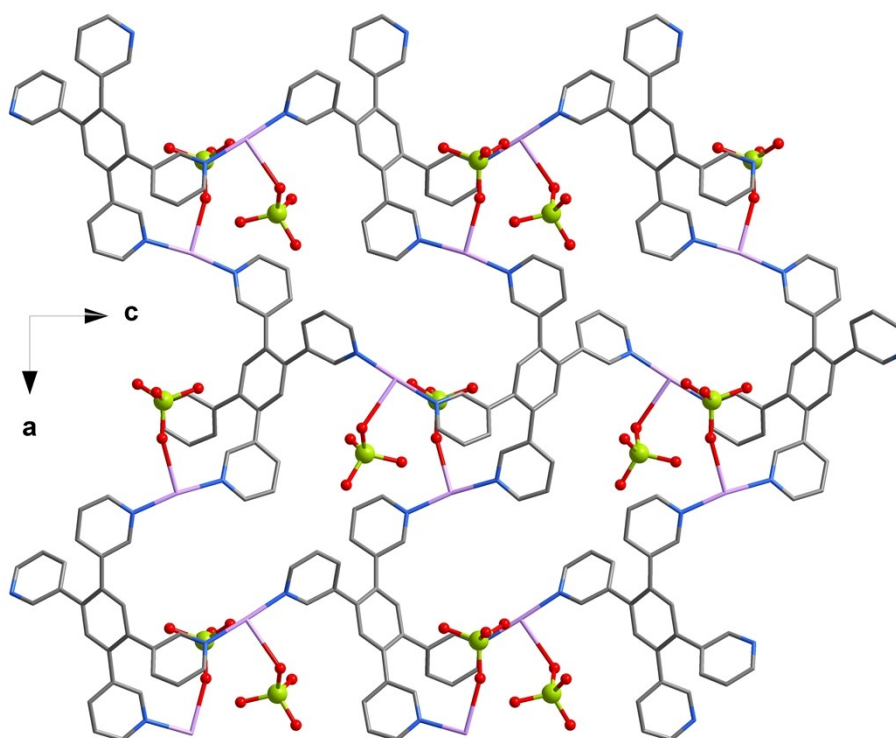

**Figure S2.** Layered crystallographic structures of TNU-132(Re).
